# Supplementary material for: Short chain fatty acids produced by Cutibacterium acnes inhibit biofilm formation by Staphylococcus epidermidis
Source: PubMed Central journal article supplement (PMC7718897; doi:10.1038/s41598-020-77790-9), 2020-12-04

## Supplementary Figures

Short chain fatty acids produced by *Cutibacterium acnes* inhibit biofilm formation by *Staphylococcus epidermidis*

**Authors:**

Kouki Nakamura<sup>1</sup>, Alan M. O'Neill<sup>1</sup>, Michael R. Williams<sup>1</sup>, Laura Cau<sup>1,2</sup>, Teruaki Nakatsuji<sup>1</sup>, Alexander R. Horswill<sup>3\*</sup>, Richard L. Gallo<sup>1</sup>

**Affiliations:**

1 Department of Dermatology, University of California San Diego, La Jolla, California, USA.

2 SILAB, R&D Department, Brive, France

3 Department of Immunology and Microbiology, University of Colorado School of Medicine, Aurora, USA

# Supplementary Figure 1

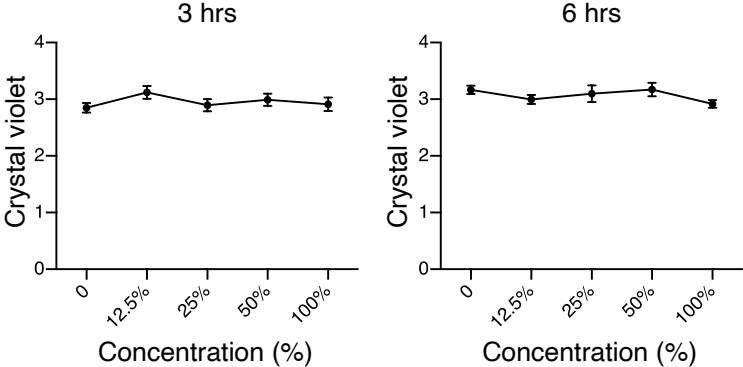

# Supplementary Figure 2

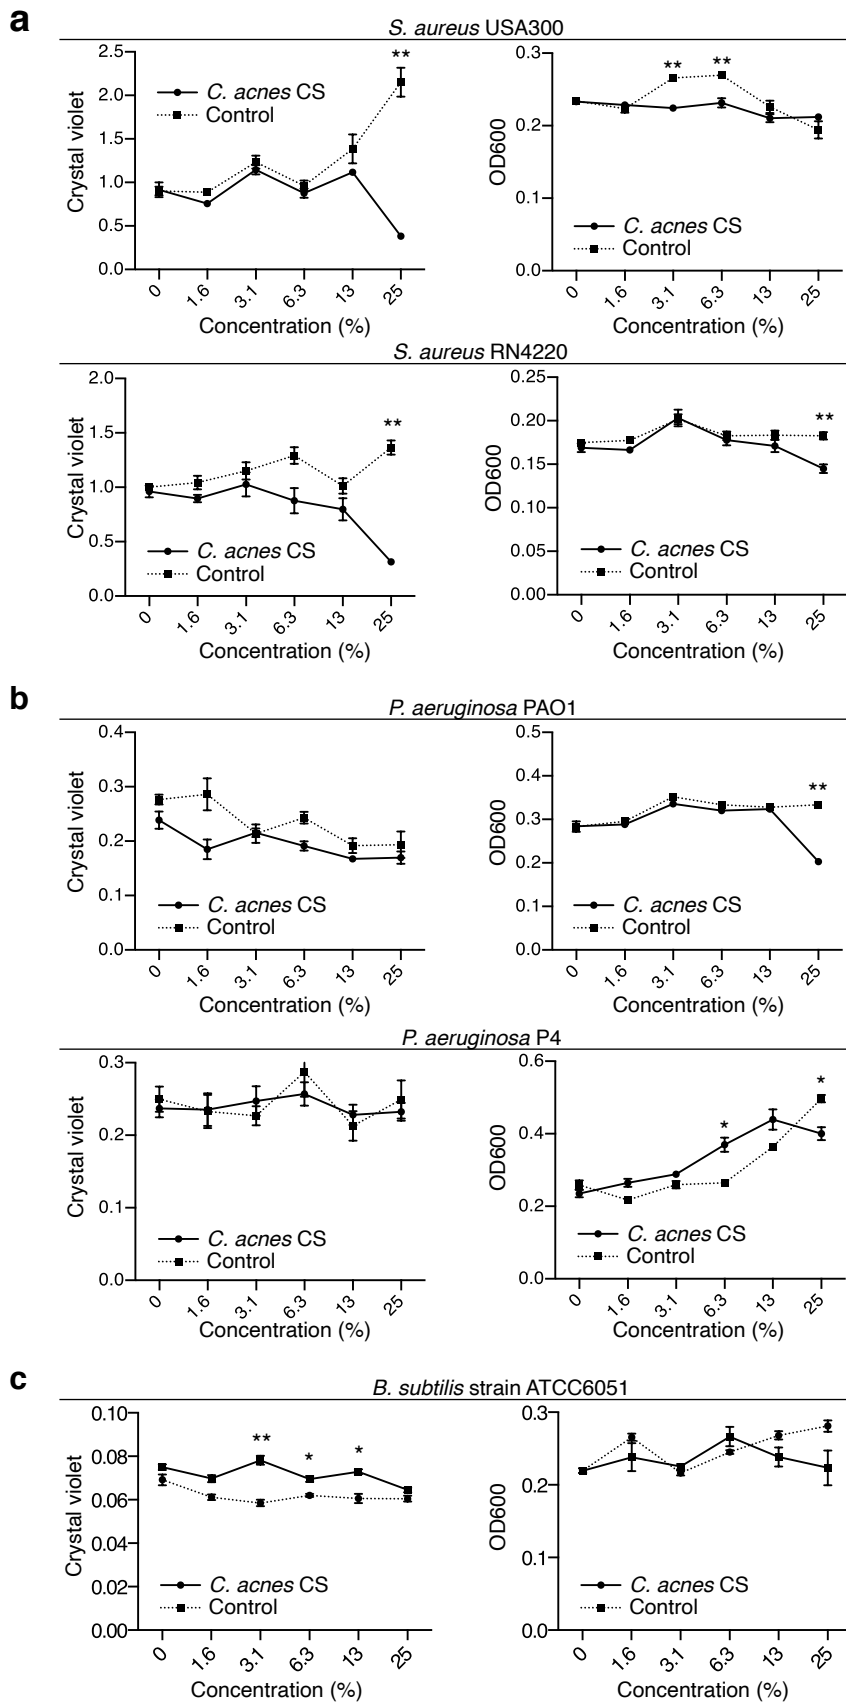

Supplement: 41598_2020_77790_MOESM2_ESM.pdf [file 41598_2020_77790_MOESM2_ESM.pdf]
